# Supplementary material
Source: Frontiers journal article supplement (https://www.frontiersin.org/articles/232702)

**Supplementary Figure 2:** Node degree distributions of the network of co-occurrence, and co-exclusion associations. Node degree indicates the number of links that connect node to others in the network. Power law degree distributions means that most nodes have only a few edges and are often connected few high-degree hub nodes.

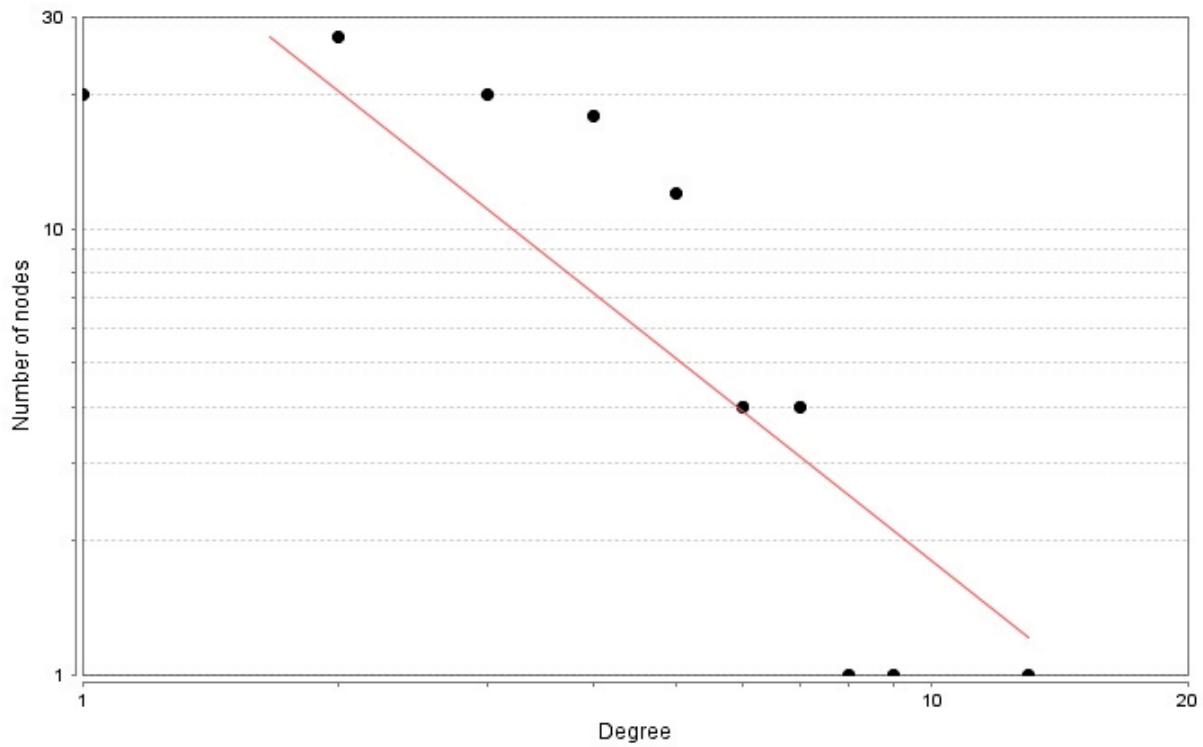

Supplement: Image_2.PDF [file Image_2.PDF]
