# Supplementary material
Source: Frontiers journal article supplement (https://www.frontiersin.org/articles/232702)

**Supplementary Figure 5:** Significant co-occurrence relationships at genus level in Known-DMs subjects. Each node represents a bacterial genus; size of the node is proportional to the abundance of the genus. Each edge represents co-occurrence relationships; edge width is proportional to the significance of supporting evidence.

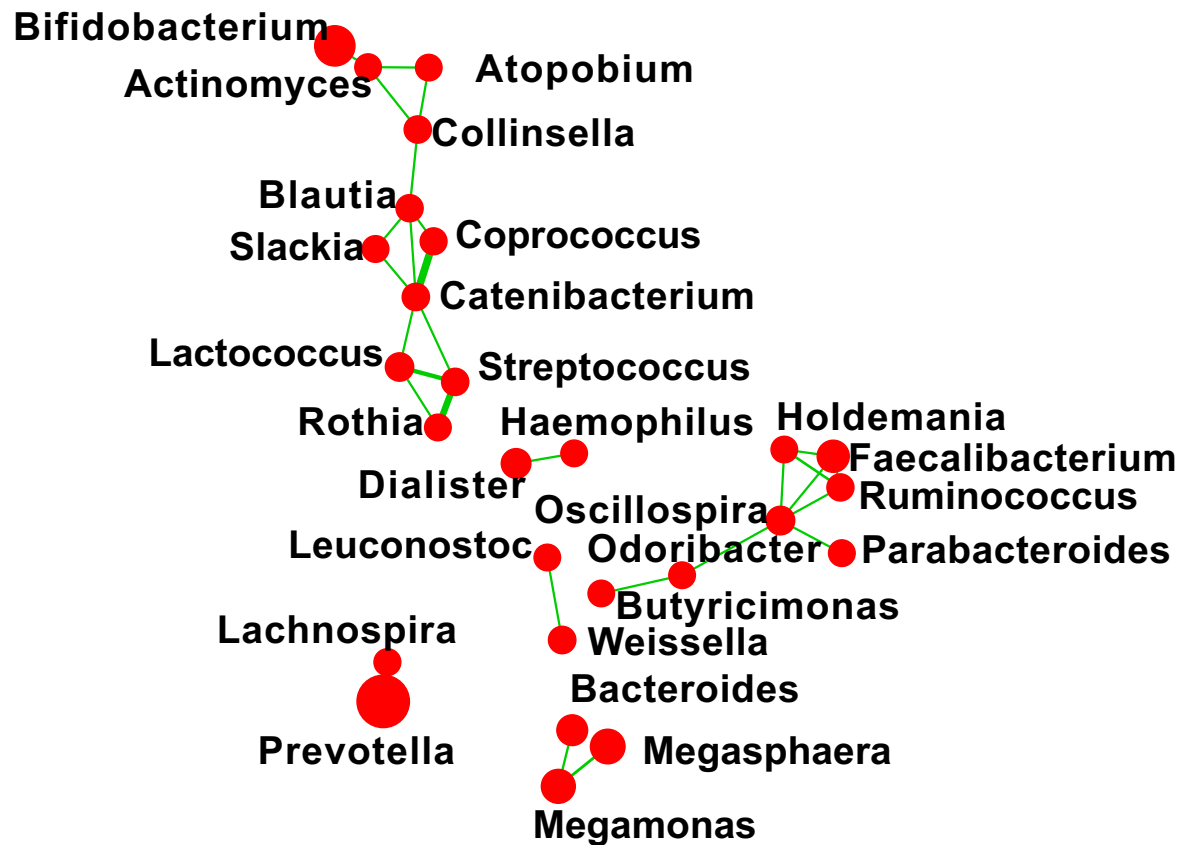

Supplement: Image_5.PDF [file Image_5.PDF]
