# Supplementary material
Source: Frontiers journal article supplement (https://www.frontiersin.org/articles/232702)

**Supplementary Figure 8:** Extended error bar plot showing the differentially enriched KOs in NGTs subjects (green bars) as compared to Known-DMs subjects (red bars)

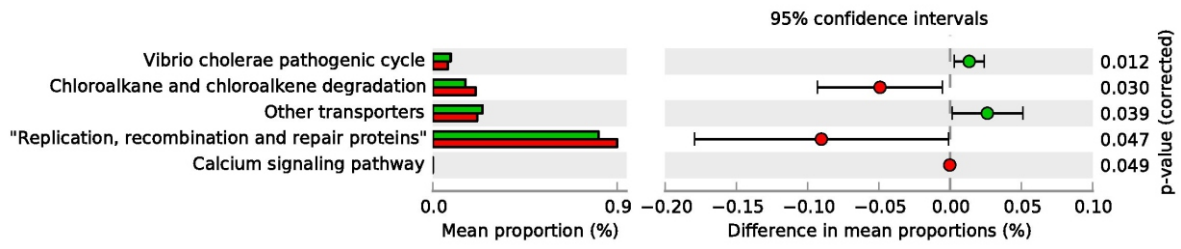

Supplement: Image_8.PDF [file Image_8.PDF]
